# Supplementary material
Source: PubMed Central journal article supplement (PMC6404558)
Supplement: fj.201801094RR.st1.pdf [file fj.201801094RR.st1.pdf]

**Table S1 (related to Figure 2I). Summary of One-way ANOVA statistical analyses of cortical cell morphologies between adequate choline, low choline and *Egfr*<sup>f/+</sup>- *Nestin-CreER*<sup>T2+/-</sup>- *Ai9*<sup>+/-</sup> E17 embryos.**

| <b>RADIAL BIPOLAR</b> | <b>Mean Diff</b> | <b>95% CI of diff</b> | <b>Significant?</b> | <b>Summary</b> | <b>Adjusted P Value</b> |
|-----------------------|------------------|-----------------------|---------------------|----------------|-------------------------|
| AC vs <i>Egfr</i> +/- | 14.1             | 7.265 to 20.94        | Yes                 | ***            | 0.0002                  |
| AC vs LC              | 20.51            | 13.67 to 27.35        | Yes                 | ****           | <0.0001                 |
| <i>Egfr</i> +/- vs LC | 6.407            | -0.4303 to 13.24      | No                  | ns             | 0.0679                  |

| <b>TANGENTIAL BIPOLAR</b> | <b>Mean Diff</b> | <b>95% CI of diff</b> | <b>Significant?</b> | <b>Summary</b> | <b>Adjusted P Value</b> |
|---------------------------|------------------|-----------------------|---------------------|----------------|-------------------------|
| AC vs <i>Egfr</i> +/-     | -5.58            | -10.32 to -0.8615     | Yes                 | *              | 0.02                    |
| AC vs LC                  | -4.53            | -9.257 to 0.1968      | No                  | ns             | 0.0612                  |
| <i>Egfr</i> +/- vs LC     | 1.058            | -3.668 to 5.785       | No                  | ns             | 0.8319                  |

| <b>MULTIPOLAR</b>     | <b>Mean Diff</b> | <b>95% CI of diff</b> | <b>Significant?</b> | <b>Summary</b> | <b>Adjusted P Value</b> |
|-----------------------|------------------|-----------------------|---------------------|----------------|-------------------------|
| AC vs <i>Egfr</i> +/- | 0.9783           | -3.716 to 5.673       | No                  | ns             | 0.8524                  |
| AC vs LC              | -1.28            | -5.974 to 3.414       | No                  | ns             | 0.7624                  |
| <i>Egfr</i> +/- vs LC | -2.25            | -6.953 to 2.436       | No                  | ns             | 0.4438                  |

| <b>UNDEFINED</b>      | <b>Mean Diff</b> | <b>95% CI of diff</b> | <b>Significant?</b> | <b>Summary</b> | <b>Adjusted P Value</b> |
|-----------------------|------------------|-----------------------|---------------------|----------------|-------------------------|
| AC vs <i>Egfr</i> +/- | -9.445           | -16.72 to -2.17       | Yes                 | *              | 0.0110                  |
| AC vs LC              | -13.52           | -20.79 to -6.24       | Yes                 | ***            | 0.0006                  |
| <i>Egfr</i> +/- vs LC | -4.05            | -11.34 to 3.205       | No                  | ns             | 0.3403                  |
